# Supplementary material for: The Defense Metabolite, Allyl Glucosinolate, Modulates Arabidopsis thaliana Biomass Dependent upon the Endogenous Glucosinolate Pathway
Source: Front Plant Sci. 2016 Jun 1;7:774. doi: 10.3389/fpls.2016.00774 (PMC4887508; doi:10.3389/fpls.2016.00774)
Supplement: Supplementary file 1 [file Table1.XLS]

## Sheet: Table S1
Table S1. List of 96 Arabidopsis thaliana natural accessions used in this study. They are grouped by their GSL chemotype profile generated by the combination of variation at GS-AOP: alkenyl (AOP2), hydroxyalkyl (AOP3), and methylsulfinyl (AOP1) and variation at GS-Elong (3C vs. 4C).
	Accession	GS-AOP	GS-ELONG	Predominant glucosinolate
	Aa-0	AOP1	C4	4MSB
	Ag-0	AOP2	C4	2OH-Butenyl
	Ang-0	AOP2	C4	2OH-Butenyl
	Bay-0	AOP3	C3	3OHP
	Bg-2	AOP2	C4	3-butenyl
	Bil-7	AOP2	C3	allyl
	Bor-1	AOP3	C3	3OHP
	Bor-4	AOP3	C3	3OHP
	Br-0	AOP2	C4	3-butenyl
	Can-0	AOP2	C3	allyl
	Cen-0	AOP2	C4	3-butenyl
	CIBC-17	AOP2	C3	allyl
	Cnt-1	AOP2	C4	2OH-Butenyl
	Col-0	AOP1	C4	4MSB
	Dem-4	AOP2	C4	3-butenyl
	Do-0	AOP1	C4	4MSB
	Dra-1	AOP1	C4	4MSB
	Dra2-1	AOP3	C3	3OHP
	Dra3-1	AOP3	C3	3OHP
	Edi-0	AOP2	C3	allyl
	Eds-1	AOP2	C3	allyl
	Ep-0	AOP1	C4	4MSB
	Est-1	AOP1	C4	4MSB
	Fei-0	AOP2	C4	2OH-Butenyl
	Ga-0	AOP2	C3	allyl
	Gie-0	AOP2	C4	3-butenyl
	Gr-1	AOP3	C3	3OHP
	Gy-0	AOP2	C4	3-butenyl
	Hau-0	AOP2	C3	allyl
	Hod	AOP2	C3	allyl
	Hov2-1	AOP2	C4	3-butenyl
	Is-0	AOP1	C4	4MSB
	Ka-0	AOP3	C3	3OHP
	Knox-10	AOP2	C3	allyl
	Knox-18	AOP2	C3	allyl
	Kondara	AOP2	C3	allyl
	Ler-1	AOP3	C3	3OHP
	Liarum	AOP2	C3	allyl
	Lis-1	AOP2	C3	allyl
	LL-0	AOP1	C4	4MSB
	Lom1-1	AOP3	C3	3OHP
	Lp2_6	AOP3	C3	3OHP
	Lp2-2	AOP3	C3	3OHP
	Lu-1	AOP3	C3	3OHP
	Lz-0	AOP3	C3	3OHP
	Mir-0	AOP2	C4	2OH-Butenyl
	Mr-0	AOP1	C4	4MSB
	Mrk-0	AOP2	C3	allyl
	Na-1	AOP1	C3	4MSB
	Nok-3	AOP2	C3	allyl
	OMO2-3	AOP2	C3	allyl
	Or-0	AOP1	C4	4MSB
	Ost-0	AOP2	C3	allyl
	Oy-0	AOP3	C3	3OHP
	Per-1	AOP1	C3	4MSB
	Petergof	AOP3	C3	3OHP
	Pna-10	AOP2	C3	allyl
	Pna-17	AOP2	C3	allyl
	Pog-0	AOP2	C3	allyl
	Pu2-23	AOP2	C3	allyl
	Pu2-7	AOP2	C3	allyl
	Pu2-8	AOP2	C3	allyl
	Rak-2	AOP3	C3	3OHP
	Ren-1	AOP3	C3	3OHP
	Rev-1	AOP1	C4	4MSB
	Rmx-A02	AOP2	C3	allyl
	RRS-7	AOP2	C3	allyl
	Rsh-4	AOP3	C3	3OHP
	Rubeznhoe-1	AOP2	C3	allyl
	San-2	AOP1	C4	4MSB
	Sanna2	AOP2	C3	allyl
	Sap-0	AOP3	C3	3OHP
	Sha	AOP2	C4	3-butenyl
	Sorbo	AOP2	C4	3-butenyl
	Sq-1	AOP2	C4	3-butenyl
	St-0	AOP3	C3	3OHP
	Ste-0	AOP2	C3	allyl
	Stw-0	AOP3	C3	3OHP
	Ta-0	AOP3	C3	3OHP
	Tamm-2	AOP2	C3	allyl
	Tamm-27	AOP2	C3	allyl
	Tottarp	AOP3	C3	3OHP
	Ts-5	AOP2	C4	3-butenyl
	Tsu-1	AOP3	C3	3OHP
	Tu-0	AOP3	C3	3OHP
	ULL2-3	AOP3	C3	3OHP
	Uod-1	AOP3	C3	3OHP
	Uod-7	AOP2	C3	allyl
	Vinmerl2	AOP2	C3	allyl
	Vins1AV	AOP3	C3	3OHP
	WAR	AOP3	C3	3OHP
	Ws-0	AOP2	C3	allyl
	Yo-0	AOP2	C3	allyl
	Zdr-1	AOP3	C3	3OHP
	Zdr-6	AOP3	C3	3OHP
	Zu-1	AOP2	C4	2OH-Butenyl
