# Supplementary material for: The Defense Metabolite, Allyl Glucosinolate, Modulates Arabidopsis thaliana Biomass Dependent upon the Endogenous Glucosinolate Pathway
Source: Front Plant Sci. 2016 Jun 1;7:774. doi: 10.3389/fpls.2016.00774 (PMC4887508; doi:10.3389/fpls.2016.00774)
Supplement: Supplementary file 8 [file Table8.XLS]

## Sheet: Table_S8
	Table S8. ANOVAs comparing plant biomass and glucosinolate response to the effect of exogenous feeding of 50 µM allyl GSL between Col-0 (WT) and the glucosinolate mutants (AOP2, gsm1, myb28/29, myb28, myb29, gsox1/3 and gsox3). Six plants per line were evaluated in a randomized partial block design providing 60 measurements per genotype per treatment.
	Individual factor Mean Squares (MS), individual factor F values and P values are presented.
	Genotypes evaluated: Myb28, Col-0
	The factor Genotype is whether the sample is wild-type or knockout mutant
		Genotype				Treatment				Genotype x Treatment				Block
		MS	F Value	Pr > F		MS	F Value	Pr > F		MS	F Value	Pr > F		MS	F Value	Pr > F
	Biomass	0.532113	0.01	0.9228		955.07	17.42	0.0008		2.6965	0.05	0.8275		50.6814	0.92	0.5311
	3MSP	8.5556	29.96	<.0001		2.4697	8.65	0.0066		0.255456	0.89	0.3526		1.81022	6.34	<.0001
	4C	536.206	125.01	<.0001		26.231	6.12	0.0206		10.1537	2.37	0.1365		6.46906	1.51	0.1992
	4MSB	502.059	120.71	<.0001		58.7102	14.12	0.0008		19.8523	4.77	0.0378		6.67528	1.61	0.1639
	4MSO/MT	3.962e-06	0.01	0.9263		0.054561	120.19	<.0001		0.000737	1.62	0.2143		0.000389	0.86	0.573
	4MTB	2.42476	140.47	<.0001		5.35042	309.95	<.0001		1.04187	60.36	<.0001		0.022217	1.29	0.2922
	5MSP	1.89095	150.02	<.0001		0.096191	7.63	0.0102		5.935e-06	0	0.9828		0.030848	2.45	0.0349
	6MSH	0.288624	53.05	<.0001		0.007345	1.35	0.2563		0.031826	5.85	0.0232		0.003073	0.56	0.8125
	7MSH	2.73975	344.18	<.0001		0.10553	13.26	0.0011		0.097805	12.29	0.0016		0.00892	1.12	0.3823
	7MTH	0.087698	0.23	0.6386		0.810934	2.09	0.1601		0.903001	2.32	0.139		1.11467	2.87	0.0164
	8MSO	0.002442	72.36	<.0001		1.028e-06	0.03	0.8628		4.61494e-08	0	0.9708		2.4626e-05	0.73	0.6784
	Allyl	0.011864	0.09	0.764		33.9139	262.91	<.0001		0.093193	0.72	0.4028		0.347324	2.69	0.0224
	I3M	0.353997	1.61	0.2151		1.92015	8.74	0.0064		0.001944	0.01	0.9257		1.33576	6.08	0.0001
	Long chain	3.48902	9.57	0.0053		0.930445	2.55	0.1244		0.00713	0.02	0.89		0.901942	2.47	0.0401
	4MOI3M	0.020055	3.48	0.0731		0.046513	8.07	0.0085		0.005111	0.89	0.3548		0.018482	3.21	0.0091
	NMOI3M	0.117732	3.62	0.0676		0.124459	3.83	0.0607		0.005717	0.18	0.6781		0.033577	1.03	0.4396
	Short chain	895.237	83.9	<.0001		80.1035	7.51	0.0108		2.96758	0.28	0.6023		52.1757	4.89	0.0006
	ShortvsLong	2317.55	16.92	0.0005		22.1826	0.16	0.6912		48.3711	0.35	0.5583		556.716	4.07	0.0035
	Genotypes evaluated: Myb29, Col-0
	The factor Genotype is whether the sample is wild-type or knockout mutant
		Genotype				Treatment				Genotype x Treatment				Block
		MS	F Value	Pr > F		MS	F Value	Pr > F		MS	F Value	Pr > F		MS	F Value	Pr > F
	Biomass	12.1569	0.13	0.725		1138.07	12.1	0.0041		3.80368	0.04	0.8438		32.7601	0.35	0.9408
	3MSP	4.93148	12.2	0.0017		0.015151	0.04	0.848		0.88927	2.2	0.1497		4.26858	10.56	<.0001
	4C	243.439	45.1	<.0001		23.2924	4.32	0.0491		10.2265	1.89	0.1819		5.17637	0.96	0.4968
	4MSB	229.535	40.12	<.0001		38.3501	6.7	0.0164		24.0956	4.21	0.0517		4.67608	0.82	0.6061
	4MSO/MT	0.00058847	2.17	0.1543		0.0347333	128.08	<.0001		0.0042839	15.8	0.0006		0.00025346	0.93	0.5148
	4MTB	1.59815	106.46	<.0001		4.75945	317.06	<.0001		1.10475	73.59	<.0001		0.0246926	1.64	0.161
	5MSP	0.553849	43.1	<.0001		0.0229451	1.79	0.1926		0.0244091	1.9	0.1794		0.0429259	3.34	0.0072
	6MSH	0.00592006	1.59	0.2189		0.0616773	16.57	0.0004		4.984e-05	0.01	0.9088		0.0121446	3.26	0.0093
	7MSH	0.102865	4.7	0.0391		0.476361	21.77	<.0001		0.00276643	0.13	0.725		0.0793029	3.62	0.0045
	7MTH	0.0528977	0.68	0.4158		0.113548	1.47	0.2364		0.0824979	1.07	0.3111		0.680815	8.79	<.0001
	8MSO	3.477e-05	0.78	0.3856		1.015e-05	0.23	0.6376		1.948e-05	0.44	0.5147		5.881e-05	1.32	0.2748
	Allyl	0.03002	0.13	0.7212		37.9446	164.32	<.0001		0.000966	0	0.9489		0.511905	2.22	0.0532
	I3M	0.033129	0.12	0.7335		1.75384	6.27	0.0186		0.0111215	0.04	0.8435		1.22448	4.38	0.0013
	Long chain	0.32493	2.01	0.1687		0.338255	2.09	0.1606		0.0691927	0.43	0.519		0.569048	3.52	0.0061
	4MOI3M	0.00528999	0.76	0.391		0.0970326	13.94	0.0009		0.0005926	0.09	0.7727		0.01559	2.24	0.0509
	NMOI3M	0.0195803	0.45	0.5063		0.0876261	2.03	0.1656		0.0175243	0.41	0.5293		0.0519018	1.2	0.3335
	Short chain	458.844	44.31	<.0001		16.0772	1.55	0.2235		10.354	1	0.3262		68.6339	6.63	<.0001
	ShortvsLong	313.108	47.42	<.0001		17.1217	2.59	0.1199		0.116274	0.02	0.8955		67.493	10.22	<.0001
	Genotypes evaluated: Myb28/29, Col-0
	The factor Genotype is whether the sample is wild-type or double knockout mutant
		Genotype				Treatment				Genotype x Treatment				Block
		MS	F Value	Pr > F		MS	F Value	Pr > F		MS	F Value	Pr > F		MS	F Value	Pr > F
	Biomass	440.711	8.25	0.0116		190.499	3.56	0.0785		255.307	4.78	0.0451		65.9799	1.23	0.3451
	3MSP	30.8673	59.88	<.0001		0.0337773	0.07	0.7999		0.778479	1.51	0.2297		1.0975	2.13	0.0625
	4C	1814.76	712.3	<.0001		21.0291	8.25	0.0084		13.3389	5.24	0.0312		4.26238	1.67	0.1509
	4MSB	1578.09	613.81	<.0001		38.8875	15.13	0.0007		28.1771	10.96	0.0029		4.10505	1.6	0.1726
	4MSO/MT	0.0165517	12.05	0.002		0.0260896	18.99	0.0002		0.0094109	6.85	0.0151		0.00117235	0.85	0.577
	4MTB	9.32245	557.77	<.0001		2.96108	177.17	<.0001		3.05959	183.06	<.0001		0.0130029	0.78	0.6379
	5MSP	4.99171	357.6	<.0001		0.0454403	3.26	0.0824		0.00893839	0.64	0.4306		0.0216556	1.55	0.1806
	6MSH	0.266132	47.08	<.0001		0.032603	5.77	0.0244		0.00248744	0.44	0.5134		0.00765165	1.35	0.2628
	7MSH	2.25193	107.13	<.0001		0.185568	8.83	0.0062		0.0427728	2.03	0.1652		0.0369048	1.76	0.1244
	7MTH	0.392654	0.7	0.4092		0.254761	0.46	0.5053		0.207019	0.37	0.5478		2.05549	3.68	0.0041
	8MSO	0.00229958	65.07	<.0001		1.6e-07	0	0.9466		6.5e-07	0.02	0.8934		2.435e-05	0.69	0.7122
	Allyl	0.0664205	0.37	0.5472		35.2116	197.17	<.0001		0.00713379	0.04	0.8431		0.33089	1.85	0.1058
	I3M	6.15821	16.05	0.0004		3.89704	10.16	0.0036		0.296272	0.77	0.3873		1.92833	5.03	0.0005
	Long chain	1.10605	0.77	0.3877		0.282242	0.2	0.6607		4.17092	2.92	0.1005		2.55377	1.79	0.1235
	4MOI3M	0.0043986	0.38	0.5407		0.0441923	3.86	0.0599		0.00591938	0.52	0.4785		0.0189159	1.65	0.1508
	NMOI3M	0.303785	4.85	0.0364		0.0986945	1.57	0.2203		0.0130507	0.21	0.6518		0.140307	2.24	0.051
	Short chain	3008.09	236.3	<.0001		19.2172	1.51	0.2298		8.08634	0.64	0.4324		28.9636	2.28	0.0477
	ShortvsLong	1134.85	97.46	<.0001		4.95494	0.43	0.5204		2.00017	0.17	0.6822		81.4291	6.99	<.0001
	Genotypes evaluated: AOP2, Col-0
	The factor Genotype is whether the sample is wild-type or overexpressed mutant
		Genotype				Treatment				Genotype x Treatment				Block
		MS	F Value	Pr > F		MS	F Value	Pr > F		MS	F Value	Pr > F		MS	F Value	Pr > F
	Biomass	1080.79	16.67	0.001		17.5506	0.27	0.6104		562.771	8.68	0.01		65.6153	1.01	0.4721
	3MSP	2.05281	0.19	0.6631		11.2433	1.06	0.3118		19.5293	1.85	0.1856		10.0838	0.95	0.4982
	4C	359.683	204.44	<.0001		0.0032583	0	0.9669		2.72548	1.55	0.2533		5.9332	3.37	0.0616
	4MSB	1262.81	112.21	<.0001		5.06293	1.31	0.2703		6.36002	1.65	0.219		4.86953	1.26	0.3325
	4MSO/MT	0.0073141	6.01	0.0441		119.486	10.62	0.0099		112.232	9.97	0.0116		8.31105	0.74	0.5888
	4MTB	4.16112	229.59	<.0001		1.8735	103.37	<.0001		1.73264	95.6	<.0001		0.0171137	0.94	0.5158
	5MSP	0.501814	0.32	0.5775		0.381026	0.24	0.6271		0.855594	0.54	0.4679		1.66271	1.05	0.4261
	Butenyl	2830.24	395.43	<.0001		191.087	26.7	<.0001		176.747	24.69	<.0001		6.23011	0.87	0.5657
	7MSH	0.592802	2.14	0.1547		0.313538	1.13	0.2964		0.00602906	0.02	0.8837		0.318607	1.15	0.3628
	7MTH	6.44701	2.26	0.1445		0.820418	0.29	0.5963		0.732778	0.26	0.6165		3.40788	1.19	0.3387
	8MSO	0.00015425	3.53	0.0716		7.269e-05	1.66	0.2086		5.357e-05	1.23	0.2785		5.202e-05	1.19	0.3423
	8MTO	0.0438701	0.5	0.4842		0.0368537	0.42	0.5211		0.0533786	0.61	0.4408		0.0821864	0.94	0.5059
	Allyl	64.0771	61.41	<.0001		83.9172	80.42	<.0001		9.19181	8.81	0.0062		1.72458	1.65	0.1502
	I3M	9.11227	1.47	0.2356		1.13917	0.18	0.6714		6.23552	1.01	0.3246		7.90995	1.28	0.2937
	Long chain	5.28853	0.93	0.3441		0.0835614	0.01	0.9044		5.15401	0.91	0.3502		6.92469	1.22	0.3289
	4MOI3M	0.0456669	0.39	0.5378		0.243559	2.08	0.161		0.0425843	0.36	0.5517		0.136785	1.17	0.3542
	NMOI3M	0.711249	1.18	0.2865		0.136928	0.23	0.6371		0.637498	1.06	0.3124		0.754619	1.25	0.3054
	Short chain	108.453	3.54	0.0711		323.49	10.56	0.0032		118.563	3.87	0.0499		112.862	3.69	0.0043
	ShortvsLong	88.4666	6.03	0.022		4.75891	0.32	0.5745		24.6333	1.68	0.2079		119.151	8.12	<.0001
	Genotypes evaluated: gsox1/3, Col-0
	The factor Genotype is whether the sample is wild-type or knockout mutant
		Genotype				Treatment				Genotype x Treatment				Block
		MS	F Value	Pr > F		MS	F Value	Pr > F		MS	F Value	Pr > F		MS	F Value	Pr > F
	Biomass	20.1324	0.22	0.6419		3110.3	33.98	<.0001		2.27638	0.02	0.8756		223.681	2.44	0.0276
	3MSP	0.0942189	0.19	0.6681		9.86933	19.51	<.0001		0.373292	0.74	0.3947		3.75304	7.42	<.0001
	4C	9.60338	0.83	0.3753		259.302	22.46	0.0002		24.7386	2.14	0.1626		11.2958	0.98	0.4923
	4MSB	1.98309	0.21	0.6491		361.497	38.59	<.0001		77.2142	8.24	0.0079		18.143	1.94	0.0891
	4MSO/MT	0.0236365	31.37	<.0001		0.0336177	44.62	<.0001		5.559e-05	0.07	0.7894		0.00066036	0.88	0.5644
	4MTB	13.3016	159.49	<.0001		1.69417	20.31	<.0001		2.10749	25.27	<.0001		0.352285	4.22	0.0012
	5MSP	0.234058	11.18	0.0016		0.793718	37.92	<.0001		0.133896	6.4	0.0148		0.086403	4.13	0.0006
	7MSH	0.0272133	1.57	0.2158		1.06936	61.87	<.0001		0.0482038	2.79	0.1016		0.0907889	5.25	<.0001
	7MTH	0.0939865	1.48	0.2301		0.122152	1.92	0.1723		0.296812	4.67	0.0359		1.08632	17.09	<.0001
	8MSO	6.707e-05	1.48	0.2296		1.477e-05	0.33	0.5706		2e-08	0	0.9846		0.00012673	2.8	0.0103
	8MTO	0.00357493	1.69	0.2005		0.00285829	1.35	0.2515		0.00115746	0.55	0.4635		0.0140953	6.66	<.0001
	Allyl	0.0366775	0.11	0.7379		59.3634	183.42	<.0001		0.0575402	0.18	0.6752		1.12468	3.47	0.0023
	I3M	0.147315	5.11	0.0284		0.233015	8.09	0.0066		0.0150692	0.52	0.4731		0.0317854	1.1	0.3789
	Long chain	0.0207779	0.19	0.6681		2.33397	20.95	<.0001		0.457275	4.1	0.0492		0.716183	6.43	<.0001
	4MOI3M	3.322e-05	0.01	0.934		0.00172715	0.36	0.5511		0.0349737	7.3	0.0096		0.0285476	5.96	<.0001
	NMOI3M	0.147315	5.11	0.0284		0.233015	8.09	0.0066		0.0150692	0.52	0.4731		0.0317854	1.1	0.3789
	Short chain	76.5179	4.13	0.0479		675.595	36.45	<.0001		113.94	6.15	0.0168		121.325	6.55	<.0001
	ShortvsLong	32.095	4.45	0.0411		1.01556	0.14	0.7095		0.020781	0	0.9575		120.696	16.73	<.0001
	Genotypes evaluated: gsox3, Col-0
	The factor Genotype is whether the sample is wild-type or knockout mutant
		Genotype				Treatment				Genotype x Treatment				Replicate
		MS	F Value	Pr > F		MS	F Value	Pr > F		MS	F Value	Pr > F		MS	F Value	Pr > F
	Biomass	77.057	1.48	0.2327		2148.14	41.35	<.0001		1.38143	0.03	0.8716		51.877	1	0.4622
	3MSP	1.04388	2.27	0.1382		6.306	13.74	0.0006		1.63878	3.57	0.065		3.75304	8.18	<.0001
	4C	2.59027	0.21	0.6502		82.2839	6.78	0.0192		27.3697	2.26	0.1526		11.8369	0.98	0.4941
	4MSB	55.212	6.87	0.0142		200.872	24.98	<.0001		37.1611	0.53	0.469		15.5901	1.94	0.0887
	4MSO/MT	0.014228	10.69	0.0048		0.0156036	11.73	0.0035		0.00101038	0.76	0.3964		0.00192051	1.44	0.2499
	4MTB	4.19029	10.26	0.0031		2.69364	6.6	0.0153		1.1166	2.73	0.1083		0.353934	0.87	0.5639
	5MSP	0.173405	7.53	0.0086		0.442931	19.24	<.0001		0.0962346	4.18	0.0465		0.086403	3.75	0.0013
	7MSH	0.00224017	0.12	0.7275		0.818557	44.89	<.0001		0.0283968	1.56	0.2183		0.0907889	4.98	0.0001
	7MTH	0.0423528	0.6	0.4418		0.0124468	0.18	0.676		0.0285628	0.41	0.5272		1.08632	15.43	<.0001
	8MSO	9.39e-06	0.2	0.655		1.069e-05	0.23	0.6336		3.42e-06	0.07	0.7871		0.00012673	2.73	0.012
	8MTO	0.001896	0.86	0.358		0.00203388	0.93	0.3412		5.5e-07	0	0.9875		0.0145043	6.6	<.0001
	Allyl	0.694099	2.26	0.1396		56.0678	182.45	<.0001		0.16882	0.55	0.4623		1.12468	3.66	0.0016
	I3M	0.914148	3.56	0.0652		5.60529	21.86	<.0001		0.513484	2	0.1637		1.45601	5.68	<.0001
	Long chain	0.00032399	0	0.9591		1.46212	12.02	0.0012		0.0878651	0.72	0.4002		0.707177	5.81	<.0001
	4MOI3M	0.00470163	0.98	0.3281		0.0258623	5.37	0.0249		0.02916	6.06	0.0176		0.0285476	5.93	<.0001
	NMOI3M	0.165444	5.76	0.0204		0.207039	7.21	0.01		0.00157244	0.05	0.816		0.0317854	1.11	0.3763
	Short chain	97.7459	5.39	0.0246		357.662	19.72	<.0001		120.563	3.87	0.0509		121.325	6.69	<.0001
	ShortvsLong	39.639	6.16	0.0173		0.212483	0.03	0.8567		23.5964	3.67	0.0625		119.91	18.63	<.0001
	Genotypes evaluated: gsm1, Col-0
	The factor Genotype is whether the sample is wild-type or knockout mutant
		Genotype				Treatment				Genotype x Treatment				Block
		MS	F Value	Pr > F		MS	F Value	Pr > F		MS	F Value	Pr > F		MS	F Value	Pr > F
	Biomass	60.7141	1.17	0.292		820.85	15.79	0.0007		465.905	8.96	0.0069		25.1308	0.48	0.8694
	3MSP	693.102	112.54	<.0001		30.086	4.89	0.0361		19.6975	3.2	0.0854		14.3386	2.33	0.0446
	4C	1403.61	573.34	<.0001		15.4353	6.3	0.0186		24.9194	10.18	0.0037		1.81	0.1147	0.2022
	4MSB	1259.64	505.47	<.0001		32.8156	13.17	0.0012		40.8239	16.38	0.0004		4.20388	1.69	0.1411
	4MSO/MT	0.00177636	4.09	0.0602		0.0410498	80.75	<.0001		0.00526373	10.35	0.0034		0.00064179	1.26	0.3028
	4MTB	8.30284	540.96	<.0001		3.78643	246.7	<.0001		2.32279	151.34	<.0001		0.0170178	1.11	0.3898
	5MSP	4.73838	356.87	<.0001		0.00433429	0.33	0.5725		0.0585035	4.41	0.0453		0.011915	0.9	0.5408
	7MSH	0.86876	105.82	<.0001		0.139637	17.01	0.0003		0.0696493	8.48	0.0071		0.0194558	2.37	0.0401
	7MTH	0.00094484	0.02	0.9026		0.0262197	0.42	0.5208		0.044804	0.72	0.4026		0.643137	10.38	<.0001
	8MSO	0.00027616	6.69	0.0154		4.53e-06	0.11	0.7432		8.1e-07	0.02	0.8898		4.602e-05	1.11	0.3864
	8MTO	0.00810096	3.64	0.0672		0.00374574	1.68	0.2057		0.00049006	0.22	0.6428		0.0122665	5.51	0.0003
	Allyl	0.86862	4.48	0.0436		42.314	218.3	<.0001		0.141439	0.73	0.4005		0.479835	2.48	0.0331
	I3M	1.60396	3.73	0.0639		3.43207	7.99	0.0088		0.178761	0.42	0.5243		1.00051	2.33	0.0433
	Long chain	0.0429486	0.02	0.8885		0.718509	0.34	0.5676		2.95014	1.38	0.2516		2.02035	0.94	0.5066
	4MOI3M	0.00364895	0.46	0.5011		0.0163674	2.09	0.1602		0.0253516	3.23	0.0835		0.0106495	1.36	0.2556
	NMOI3M	0.0263548	0.65	0.4261		0.240568	5.96	0.0215		0.00385401	0.1	0.7597		0.0334606	0.83	0.5957
	Short chain	188.256	14.22	0.0008		102.577	7.75	0.0097		8.4136	0.64	0.4323		83.3455	6.29	<.0001
	ShortvsLong	526.671	3.16	0.0875		9.37657	0.06	0.8144		0.000103	0	0.9994		519.131	3.12	0.0118
